# Supplementary material
Source: Springer Nature journal article supplement (https://www.springermedizin.de/resource/supplementary/12906_2010_307_MOESM7_ESM.pdf/9519386)
Supplement: MOESM7 [file 9519386]

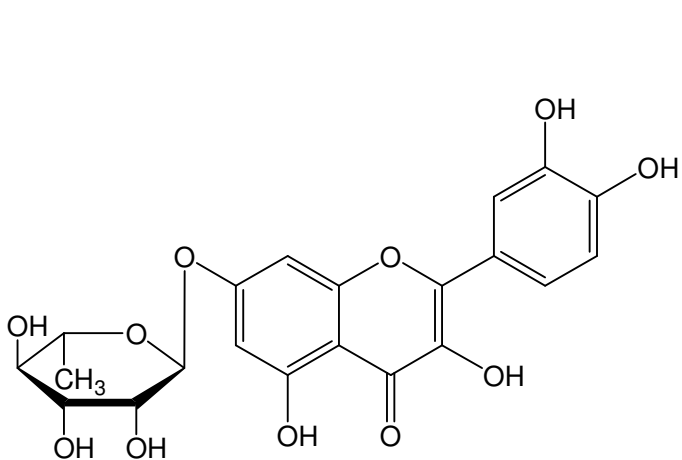

**Compound A**  
**Quercetin-7-Rhamnoside**

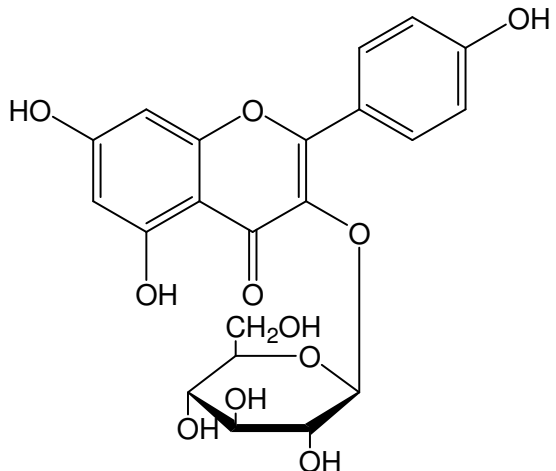

**Compound B**  
**Kaempferol-3-Glucoside**

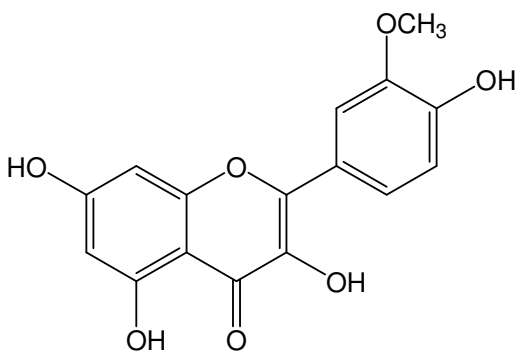

**Compound C**  
**Isorhamnetin**

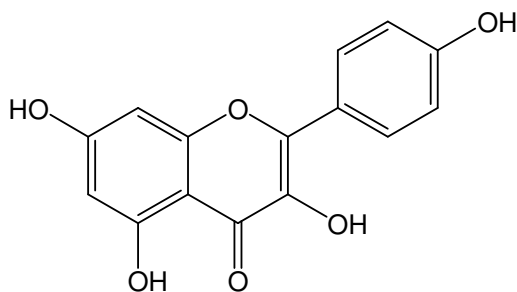

**Compound D**  
**Kaempferol**

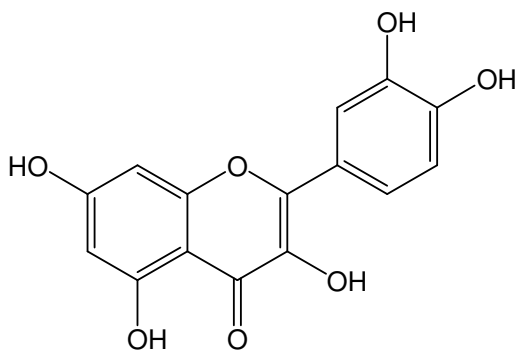

**Compound E**  
**Quercetin**
